# Supplementary material for: Bimetallic nanodendrites via selective overgrowth of noble metals on multiply twinned Au seeds
Source: Royal Society of Chemistry journal article supplement (doi:10.1039/c3ta14121g), 2013-11-11
Supplement: c3ta14121g.pdf [file c3ta14121g.pdf]

## Electronic Supplementary Information

### **Bimetallic nanodendrites via selective overgrowth of noble metals on multiply twinned Au seeds**

Yan Feng,<sup>†‡</sup> Hui Liu<sup>†‡</sup> and Jun Yang<sup>\*†</sup>

*<sup>†</sup>State Key Laboratory of Multiphase Complex Systems, Institute of Process Engineering, Chinese Academy of Sciences, Beijing, China 100190. Fax: 86-10-8254 4915; Tel: 86-10-8254 4915; E-mail: [jyang@mail.ipe.ac.cn](mailto:jyang@mail.ipe.ac.cn)*

*<sup>‡</sup>University of Chinese Academy of Sciences, No. 19A Yuquan Road, Beijing, China 100190*

Financial support from the 100 Talents Program of the Chinese Academy of Sciences, National Natural Science Foundation of China (No.: 21173226, 21106151), and State Key Laboratory of Multiphase Complex Systems, Institute of Process Engineering, Chinese Academy of Sciences (MPCS-2012-A-11, MPCS-2011-D-08, MPCS-2010-C-02) is gratefully acknowledged.

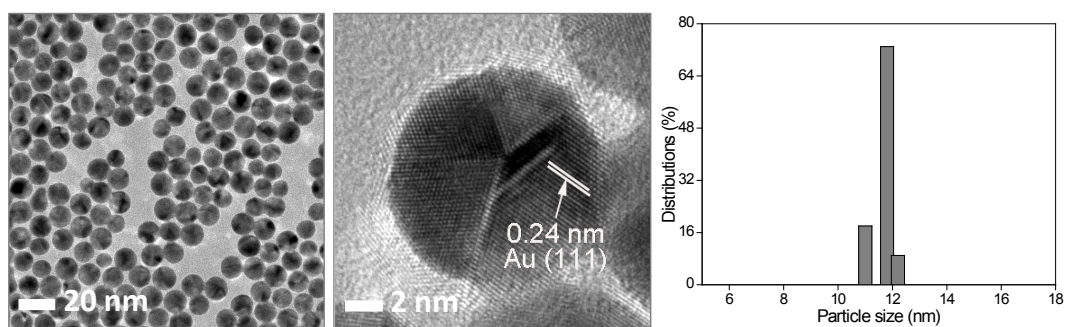

**Fig. S1** (a)TEM image, (b) HRTEM image, and (c) size distribution of as-prepared Au nanoparticles, average diameter ( $d$ ) = 11.4 nm, standard deviation ( $\sigma$ ) = 0.72 nm, relative standard deviation ( $\bar{\sigma}$ ) = 6.3%.

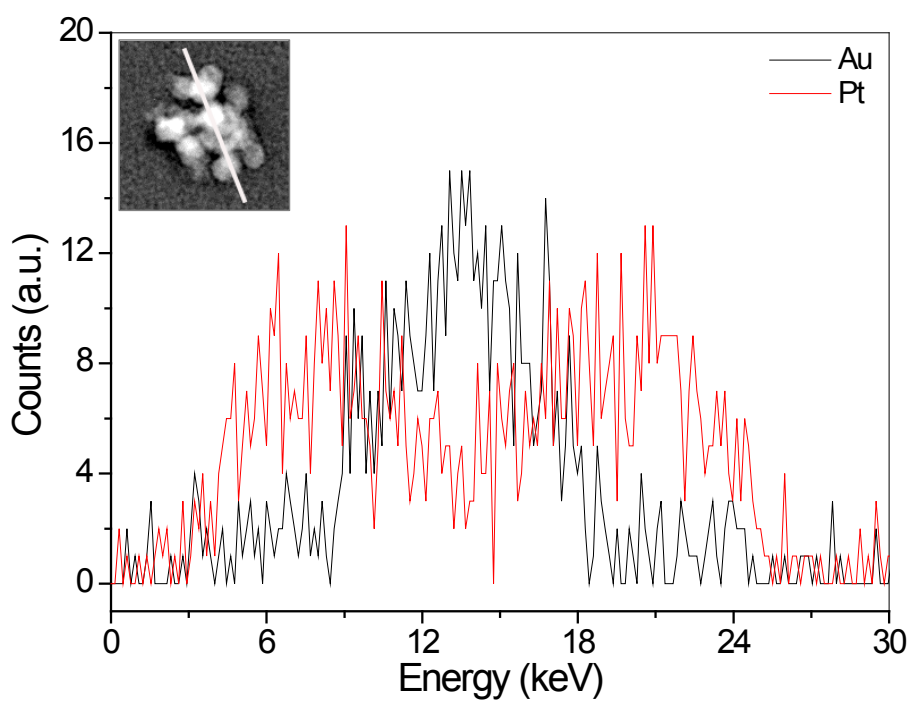

**Fig. S2** EDX line scan across the inserted Au-Pt dendritic particle showing atomic composition (Au-black, Pt-red) as a function of the position across the particle.

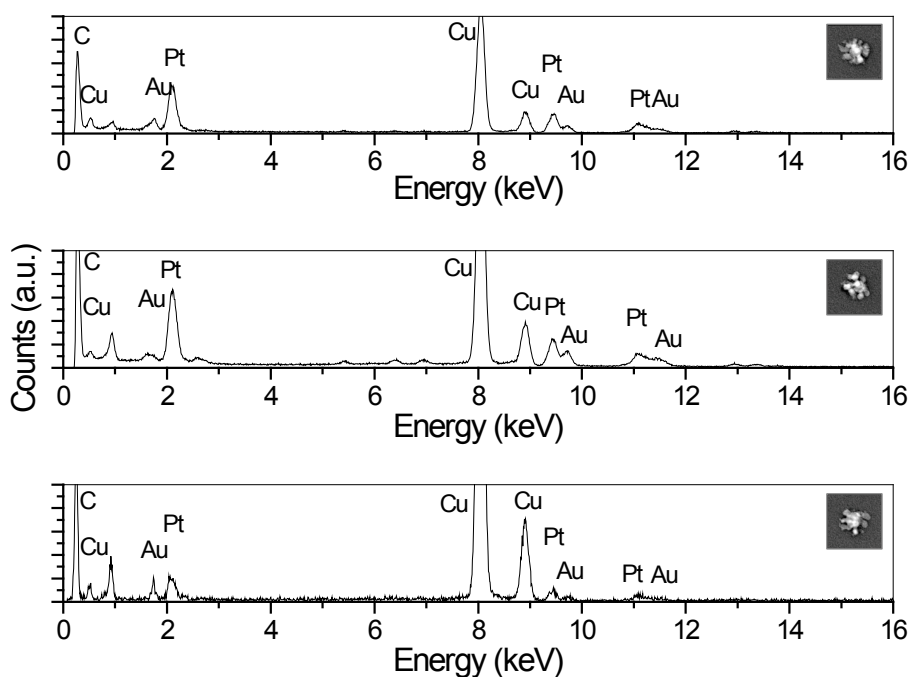

**Fig. S3** The STEM-EDX spectra of three individual dendritic Au-Pt nanoparticles showing the absence of isolated Au or Pt structures in the final heterogeneous bimetallic products.

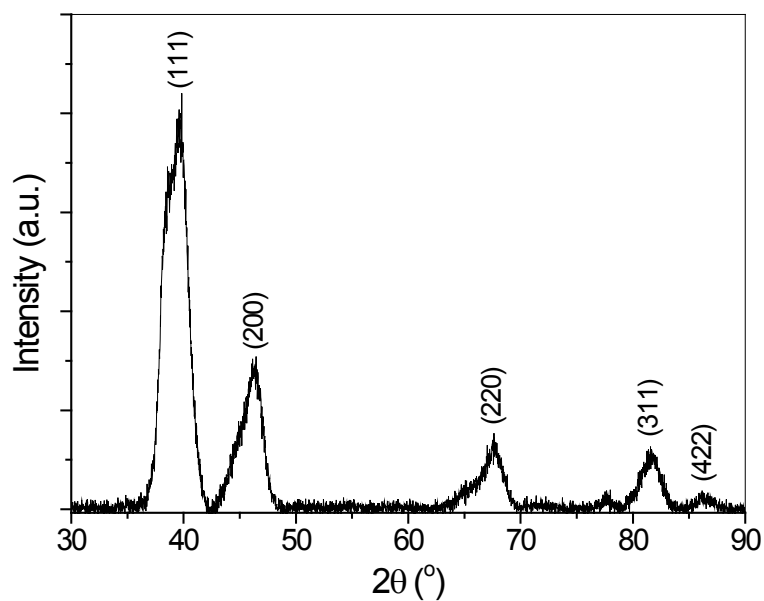

**Fig. S4** X-ray diffraction (XRD) pattern of the bimetallic Au-Pt nanodendrites showing the particles have well-developed crystallinity.

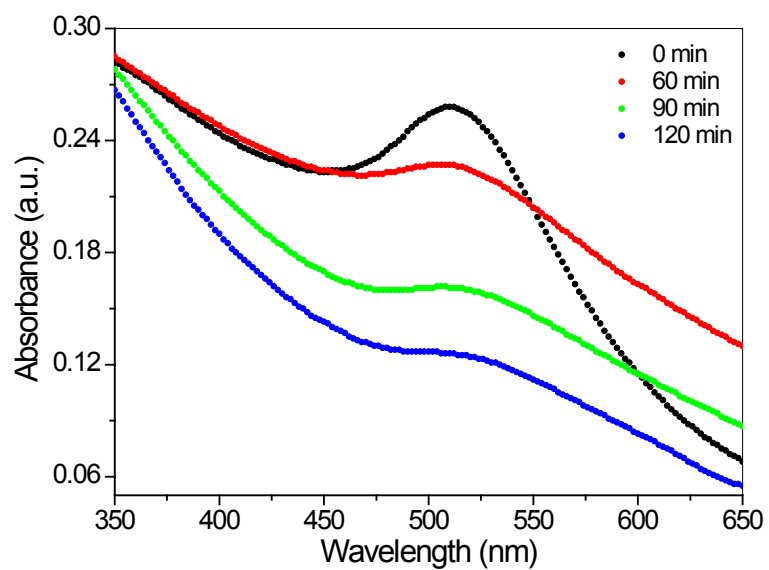

**Fig. S5** UV-vis spectra of the bimetallic Au-Pt nanoparticle solution collected at different reaction time, showing the growth process of the dendritic Au-Pt nanoparticles.

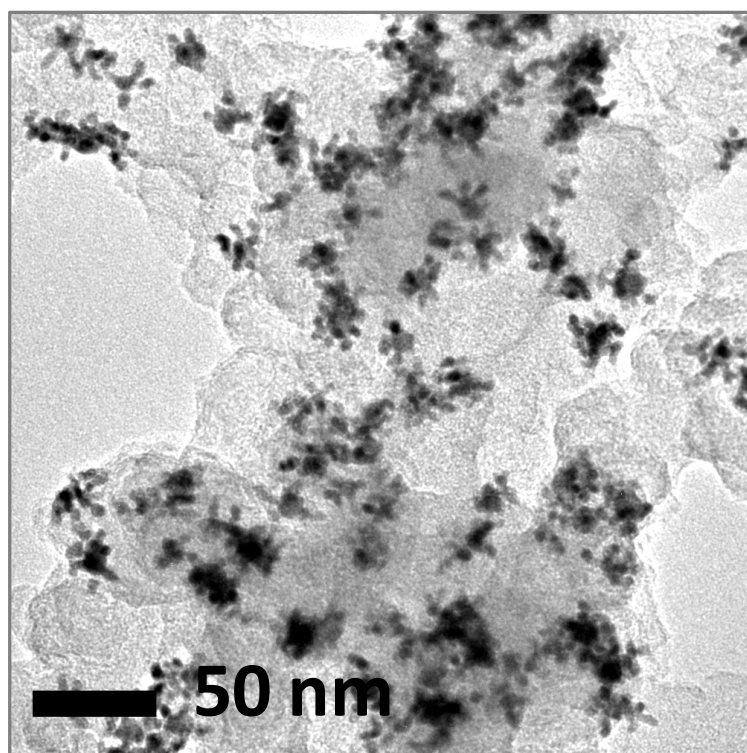

**Fig. S6** Representative TEM image of bimetallic Au-Pt nanodendrites loaded on Vulcan carbon support.
